# Supplementary material for: Compressive mechanical stress enhances susceptibility to interleukin-1 by increasing interleukin-1 receptor expression in 3D-cultured ATDC5 cells
Source: PubMed Central journal article supplement (PMC7923672; doi:10.1186/s12891-021-04095-x), 2021-03-01
Supplement: 12891_2021_4095_MOESM1_ESM.pdf [file 12891_2021_4095_MOESM1_ESM.pdf]

# Supplementary Figure

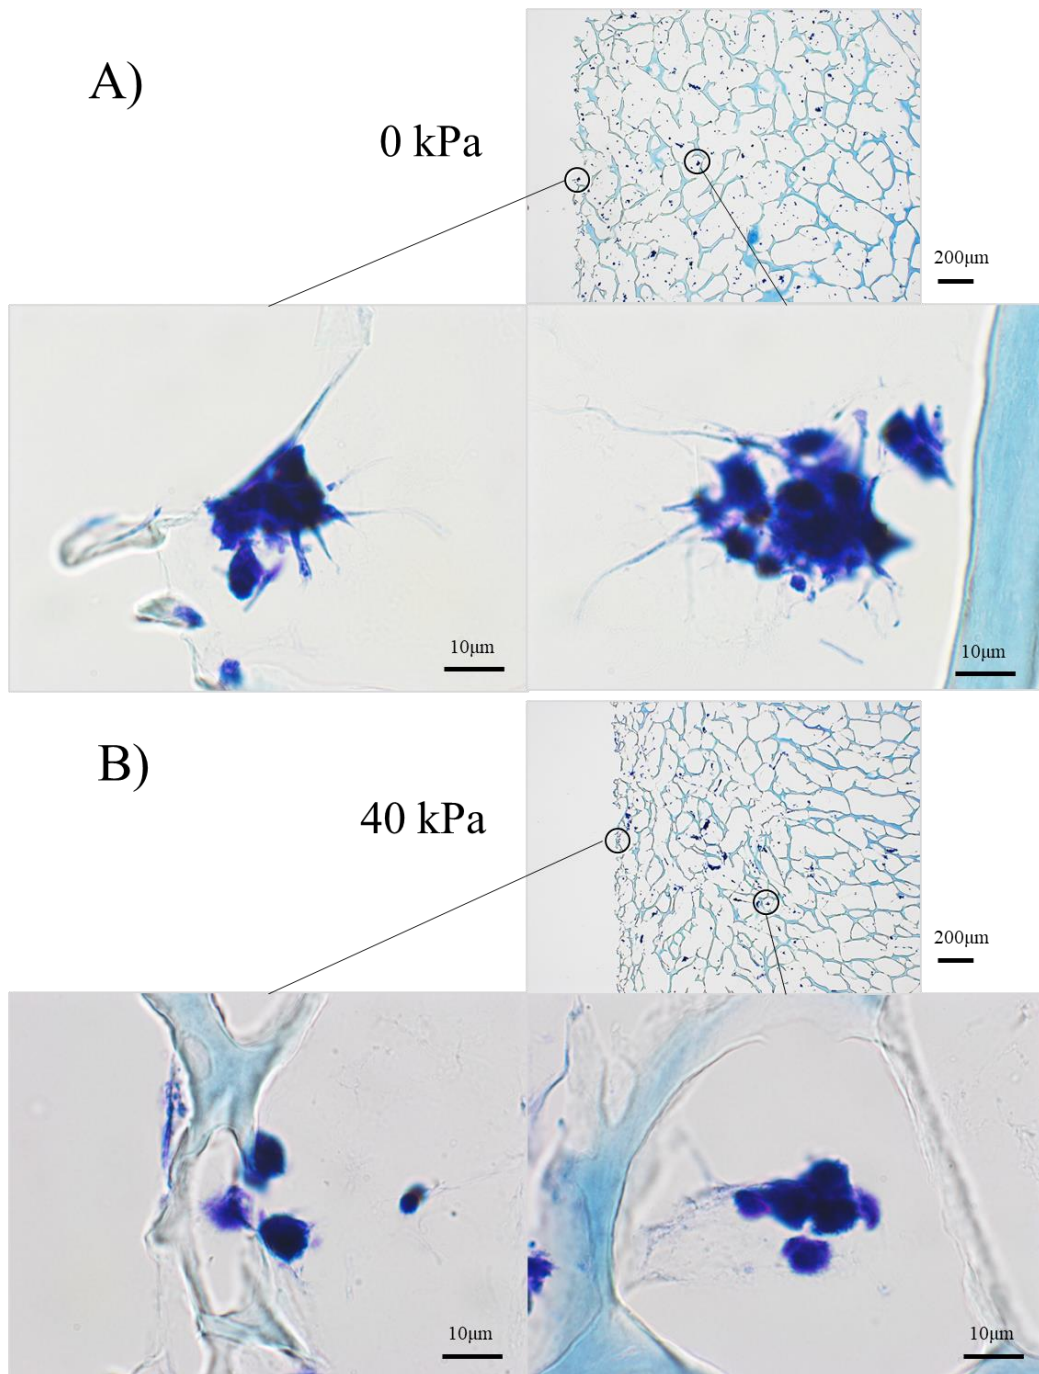

At 0kPa, cells extended their cell protrusions in 3D-cultured constructs (A). At 40 kPa, the cell protrusions disappeared and many cells slightly exhibited a round shape (B).
